# Supplementary material
Source: Springer Nature journal article supplement (https://www.springermedizin.de/resource/supplementary/12885_2011_2838_MOESM5_ESM.pdf/9462126)

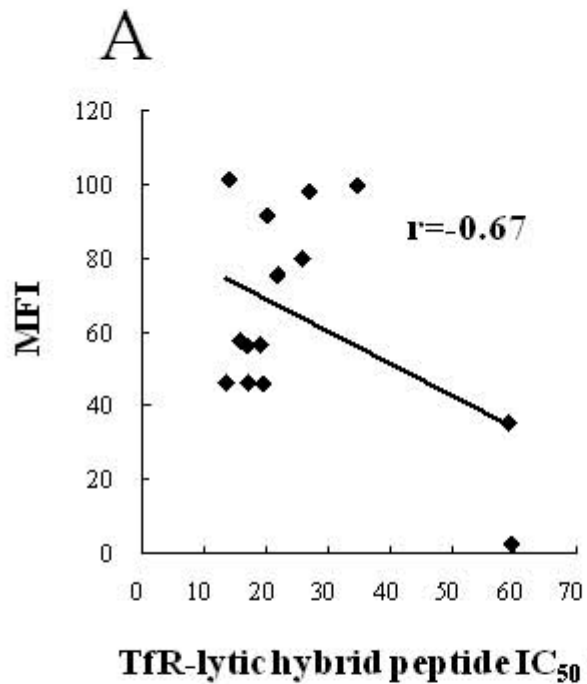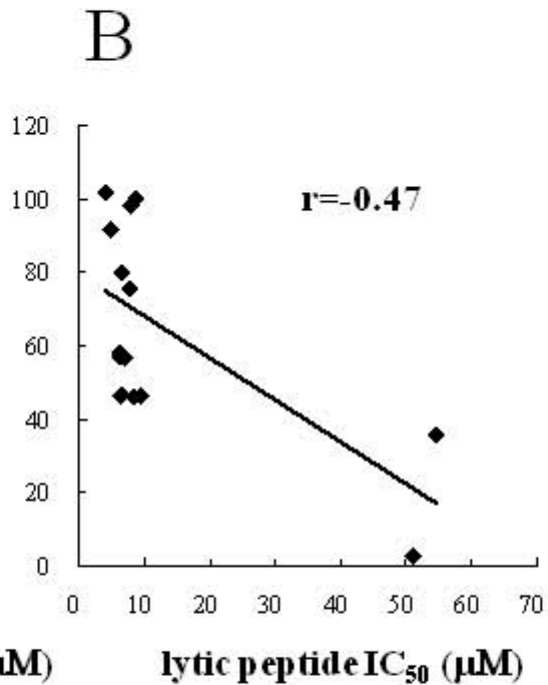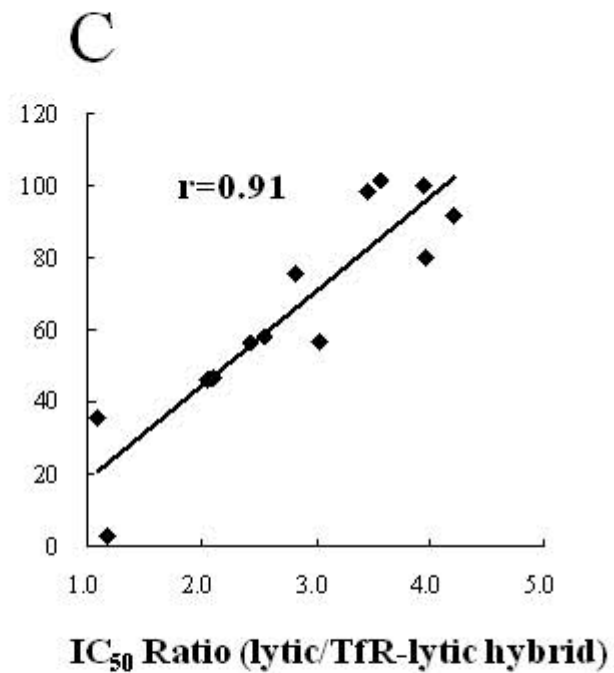

Supplement: MOESM5 [file 9462126]
